# Supplementary material
Source: HighWire-hosted journal article supplement (https://jmg.bmj.com/content/60/4/397)

**Supplementary Table 1. Clinical features of patients with the c.278\_289delinsCCGCTCTCT *UMOD* variant**

|                                          | n (%)   |
|------------------------------------------|---------|
| <b>CKD Staging</b>                       |         |
| No CKD                                   | 16 (18) |
| Median age (years)                       | 30      |
| CKD 3                                    | 7 (8)   |
| CKD 4                                    | 4 (4.5) |
| Kidney failure                           | 61 (69) |
| Median age (years)                       | 52      |
| Earliest onset of kidney failure (years) | 32      |
| Latest onset of kidney failure (years)   | 76      |
| <b>Renal Ultrasound</b>                  |         |
| Available imaging                        | 28      |
| Kidney length                            |         |
| Normal (10-12cm)                         | 17 (61) |
| Small (<10cm)                            | 11 (39) |
| Cysts in each kidney                     |         |
| No cyst                                  | 22 (79) |
| 1 – 2                                    | 5 (18)  |
| ≥ 10                                     | 1 (4)   |
| <b>Hypertension</b>                      |         |
| Diagnosed                                | 30 (65) |
| No hypertension                          | 16 (35) |
| Unknown                                  | 42      |
| <b>Proteinuria</b>                       |         |
| A1 (<30mg/g)                             | 36 (90) |
| A2 (30-300mg/g)                          | 2 (10)  |
| A3 (>300mg/g)                            | 1 (5)   |
| Not quantified                           |         |
| Trace                                    | 1 (5)   |
| Unknown                                  | 48      |
| <b>Haematuria</b>                        |         |
| No haematuria                            | 33 (83) |
| Haematuria present                       |         |
| Trace                                    | 3 (8)   |
| 1+                                       | 4 (10)  |
| Unknown                                  | 48      |
| <b>Gout</b>                              |         |
| ≥ 1 episode of gout diagnosed            | 6 (6.8) |
| Median age of onset (years)              | 42.5    |
| No gout                                  | 82 (93) |
| <b>Uric Acid</b>                         |         |
| Raised at presentation                   | 9 (32)  |
| Raised at least one instance             | 17 (61) |
| Never raised                             | 11 (39) |
| Unknown                                  | 51      |
| <b>Renal stone</b>                       |         |
| Present                                  | 2 (4)   |
| Absent                                   | 53 (96) |
| Unknown                                  | 33      |
| <b>UTI</b>                               |         |
| ≥ 1 episode of symptomatic UTI           | 8 (15)  |
| Absent                                   | 47 (85) |
| Unknown                                  | 33      |

**Supplementary Table 2. Renal biopsy findings of patients with the c.278\_289delinsCCGCCTCT *UMOD* variant**

| Patient | Biopsy findings                                                                                                                                                                                                                                                                            | Number of glomeruli affected                                                                                                   | Immunofluorescence                                    | Electron microscopy                                                                       | Indication for biopsy                                                                                                      |
|---------|--------------------------------------------------------------------------------------------------------------------------------------------------------------------------------------------------------------------------------------------------------------------------------------------|--------------------------------------------------------------------------------------------------------------------------------|-------------------------------------------------------|-------------------------------------------------------------------------------------------|----------------------------------------------------------------------------------------------------------------------------|
| SN2.12  | Glomerulonephritis and tubulointerstitial fibrosis                                                                                                                                                                                                                                         | -                                                                                                                              | -                                                     | -                                                                                         | Unknown                                                                                                                    |
| SN3.1   | Cellular interstitial aggregates of mixed origin. Significant renal scarring, interstitial fibrosis, tubular atrophy, marked vasculopathy. Tubulitis.<br><br>1 artery with significantly thickened wall and multiple elastic laminae layers. The arterioles show focal nodular hyalinosis. | 5 of 11 glomeruli are obsolete.                                                                                                | No immune reactants.<br>-                             | No immune complex deposits. Only hyaline casts were present.                              | Proteinuria, CKD, Hypertension, Raised calcium (2.93)                                                                      |
| SN3.2   | Significant interstitial fibrosis and tubular atrophy.<br><br>Part of a medium sized artery is seen showing thickening of the wall.<br><br>Tamm-Horsfall protein casts seen without myeloma casts in tubules.                                                                              | 6 of 8 glomeruli globally sclerosed, remaining 2 showed peripheral fibrosis.                                                   | No immune reactants.<br>-                             |                                                                                           | Proteinuria, CKD 3, Hypertension                                                                                           |
| SN3.5   | Interstitial fibrosis and tubular atrophy.<br><br>One artery with marked chronic vasculopathy                                                                                                                                                                                              | 3 of 12 glomeruli affected. 2 obsolete, 1 showed single podocyte with bubbly, clear, foamy cytoplasmic appearances.            | -                                                     | Podocytes with increased numbers of enlarged lysosomes filled with myelinoid material.    | Rapid renal function decline, raised IgG Kappa (5.5g/L) with slightly raised (6.7%) plasma cells on BM.                    |
| SN6.1   | Excess glomerular loss and interstitial fibrosis. Glomerular hypertrophy<br><br>Normal arterial profile                                                                                                                                                                                    | 7 of 14 globally sclerosed. Non sclerosed glomeruli are generally enlarged, no mesangial hypercellularity, segmental sclerosis | Minimal deposition of IgA within glomerular mesangium | No electron dense deposit or fibrillary material. Normal glomerular basement membrane. No | eGFR 46, no proteinuria, SOBOE, Hypertensive, Obese, Strong FHx of renal disease but related to diabetes in family members |

|        |                                                                                                                                                                                                         |                                                             |                      |                                                                                                                                                      |                                                                                                                          |
|--------|---------------------------------------------------------------------------------------------------------------------------------------------------------------------------------------------------------|-------------------------------------------------------------|----------------------|------------------------------------------------------------------------------------------------------------------------------------------------------|--------------------------------------------------------------------------------------------------------------------------|
|        |                                                                                                                                                                                                         |                                                             |                      | foot process effacement.                                                                                                                             |                                                                                                                          |
| SN8.5  | Normal                                                                                                                                                                                                  |                                                             |                      |                                                                                                                                                      |                                                                                                                          |
| SN10.2 | Advanced focal glomerulosclerosis and advanced tubulointerstitial fibrosis. Widespread tubular atrophy<br><br>Arterioles are thick walled but show no hyalinosis.                                       | 5 of 7 globally sclerosed. Non sclerosed glomeruli enlarged | No immune reactants. | No electron dense or fibrillary deposit. Mild wrinkling of capillary loops but normal glomerular basement membrane. Minimal foot process effacement. | Decline of renal function, FHx of renal disease, negative nephritic screen                                               |
| SN11.1 | Advanced glomerulosclerosis, interstitial fibrosis, heavy infiltrate of lymphocytes and plasma cells, tubular atrophy<br><br>Arteries are thick walled but without hyalinosis or intimal proliferation. | 13 of 26 obsolete                                           | No immune reactants. | Mild expansion of mesangial region, no proliferation<br>Normal glomerular basement membrane. Minimal foot process effacement.                        | Strong family history of renal disease, declining renal function, biopsy 4 years ago showed non-specific chronic changes |

**Supplementary Table 3. Individuals in 100,000 Genome Project Cohort with the c.278\_289delinsCCGCCTCCT *UMOD* variant**

| Family ID | Proband | Sex    | Renal | Disease                     | Phenotypes                                                                                                                          |
|-----------|---------|--------|-------|-----------------------------|-------------------------------------------------------------------------------------------------------------------------------------|
| GE1       | Yes     | Female | Yes   | CAKUT                       | CKD (HP:0012622), Hypertension (HP:0000822), Obesity (HP:0001513), Polycystic ovaries (HP:0000147), Gluten intolerance (HP:0012538) |
| GE1       | No      | Female | Yes   | CAKUT                       | CKD (HP:0012622), Hyperparathyroidism (HP:0000843)                                                                                  |
| GE2       | Yes     | Male   | Yes   | Proteinuric renal disease   | CKD (HP:0012622), Hypertension (HP:0000822)                                                                                         |
| GE2       | No      | Male   | Yes   | Proteinuric renal disease   |                                                                                                                                     |
| GE3       | Yes     | Female | Yes   | Proteinuric renal disease   | Polycystic kidney dysplasia (HP:0000113), Proteinuria (HP:0000093), Obesity (HP:0001513)                                            |
| GE3       | No      | Female | Yes   | Proteinuric renal disease   | Polycystic kidney dysplasia (HP:0000113), Proteinuria (HP:0000093), Diabetes Mellitus (HP:0000819)                                  |
| GE4       | Yes     | Male   | No    | Intellectual disability     | Autistic behaviour (HP:0000729), Global developmental delay (HP:0001263)                                                            |
| GE4       | No      | Male   | No    |                             |                                                                                                                                     |
| GE5       | Yes     | Male   | No    | Intellectual disability     | Delayed speech and language development (HP:0000750), Global developmental delay (HP:0001263)                                       |
| GE5       | No      | Female | No    | Intellectual disability     | Delayed speech and language development (HP:0000750), Inability to walk (HP:0002540)                                                |
| GE5       | No      | Male   | No    |                             |                                                                                                                                     |
| GE6       | Yes     | Female | Yes   | Unexplained kidney failure  | Nephrosclerosis (HP:0009741), Proteinuria (HP:0000093), Edema (HP:0000969)                                                          |
| GE6       | No      | Male   | Yes   | Unexplained kidney failure  | Stage 4 CKD (HP:0012626), CKD (HP:0012622), Hypertension (HP:0000822), Multiple renal cysts (HP:0005562)                            |
| GE7       | Yes     | Female | Yes   | Familial haematuria         | Stage 4 CKD (HP:0012626), Renal cortical atrophy (HP:0002048), Microscopic hematuria (HP:0002907), Gout (HP:0001997)                |
| GE7       | No      | Female | Yes   |                             | Stage 3 CKD (HP:0012625), Hematuria (HP:0000790)                                                                                    |
| GE8       | Yes     | Male   | No    | Hypertrophic Cardiomyopathy | Hypertension (HP:0000822), Dyspnea (HP:0002094), Hypertrophic cardiomyopathy (HP:0001639)                                           |
| GE9       | Yes     | Male   | Yes   | Unexplained kidney failure  | CKD (HP:0012622), Renal atrophy (HP:0012585)                                                                                        |
| GE10      | Yes     | Female | No    | Adult Glioma                |                                                                                                                                     |
| GE11      | Yes     | Male   | Yes   | Renal Cancer                |                                                                                                                                     |
| GE12      | Yes     | Male   | No    | Prostate Adenocarcinoma     |                                                                                                                                     |

Figure S1

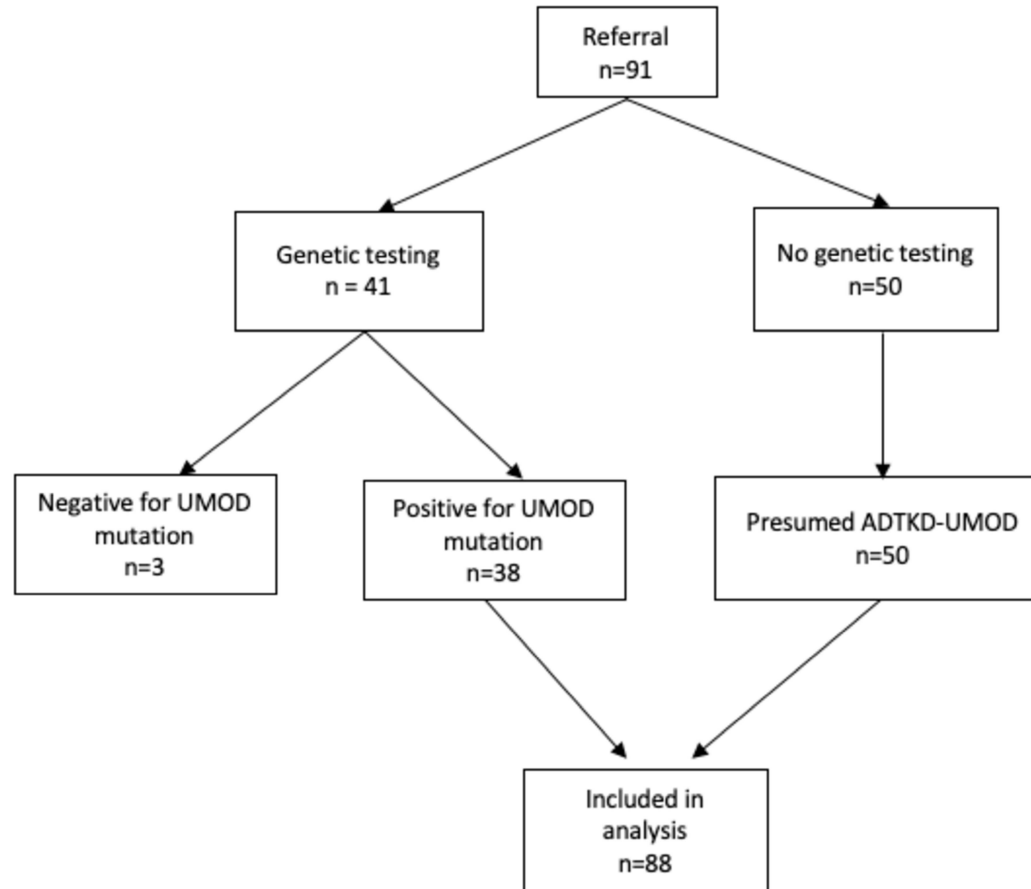

Figure S2

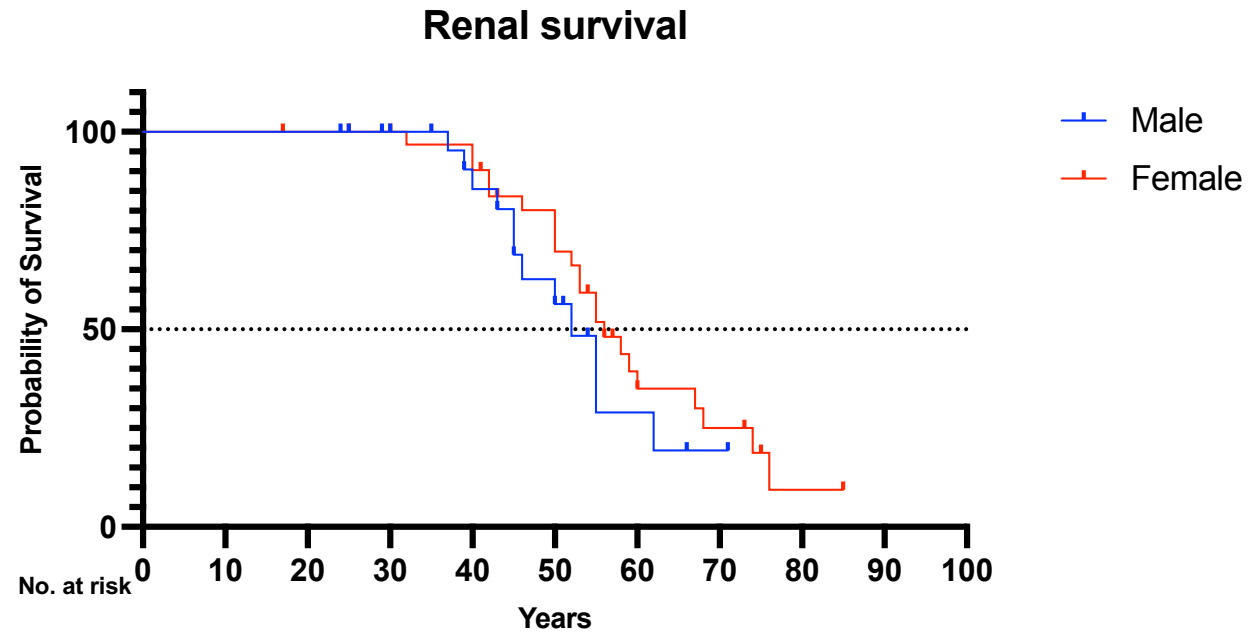

|               |    |    |    |    |    |    |   |   |     |
|---------------|----|----|----|----|----|----|---|---|-----|
| <b>Male</b>   | 27 | 27 | 27 | 24 | 18 | 10 | 3 | 1 | N/A |
| <b>Female</b> | 35 | 35 | 35 | 32 | 30 | 23 | 9 | 5 | 1   |

Figure S3

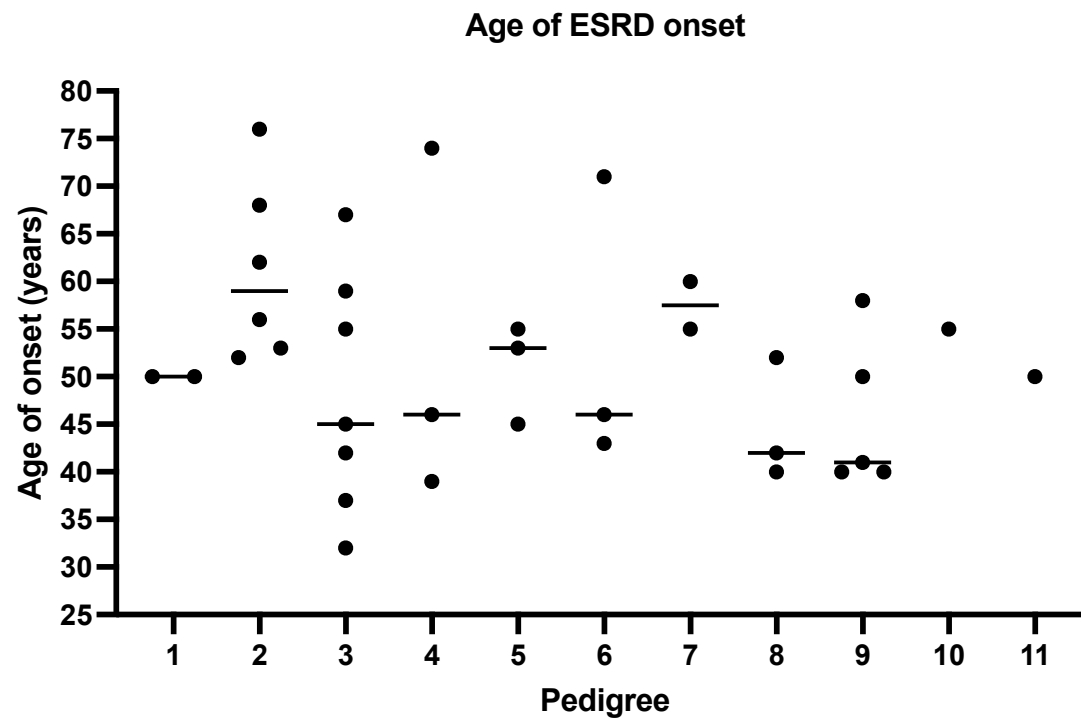

Figure S4

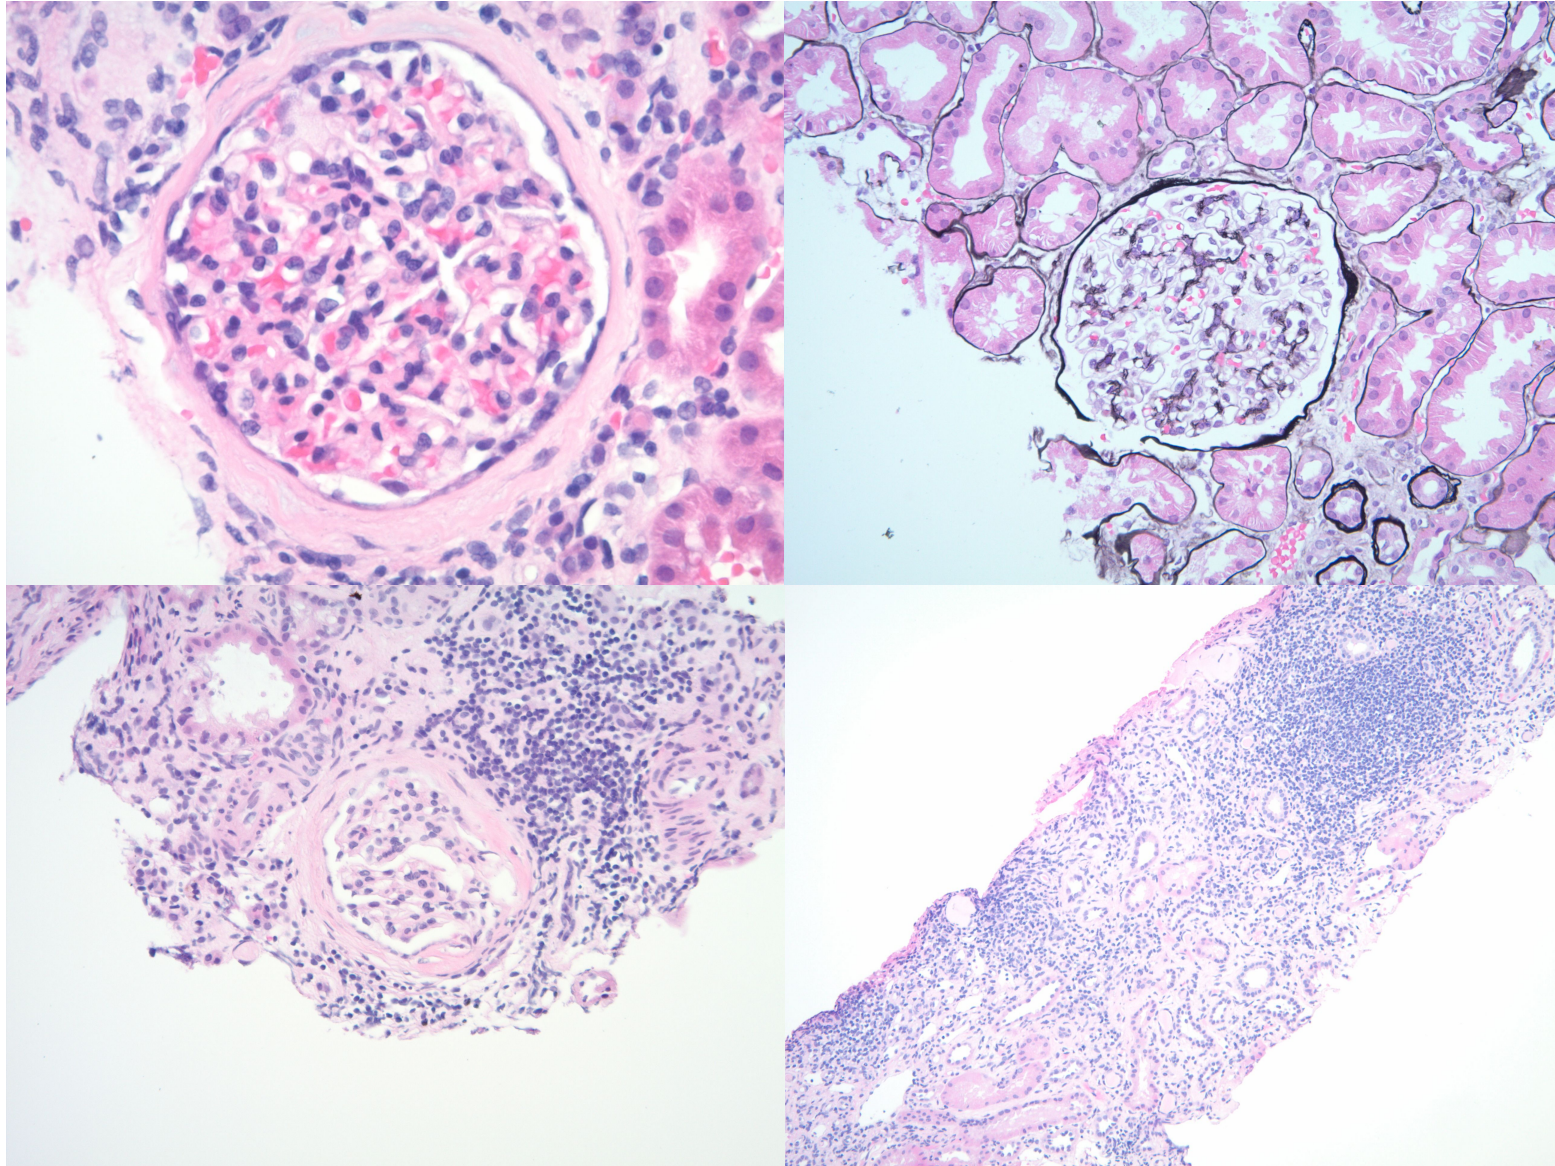

3.1

3.2



# Sheffield Cohort

Figure S5

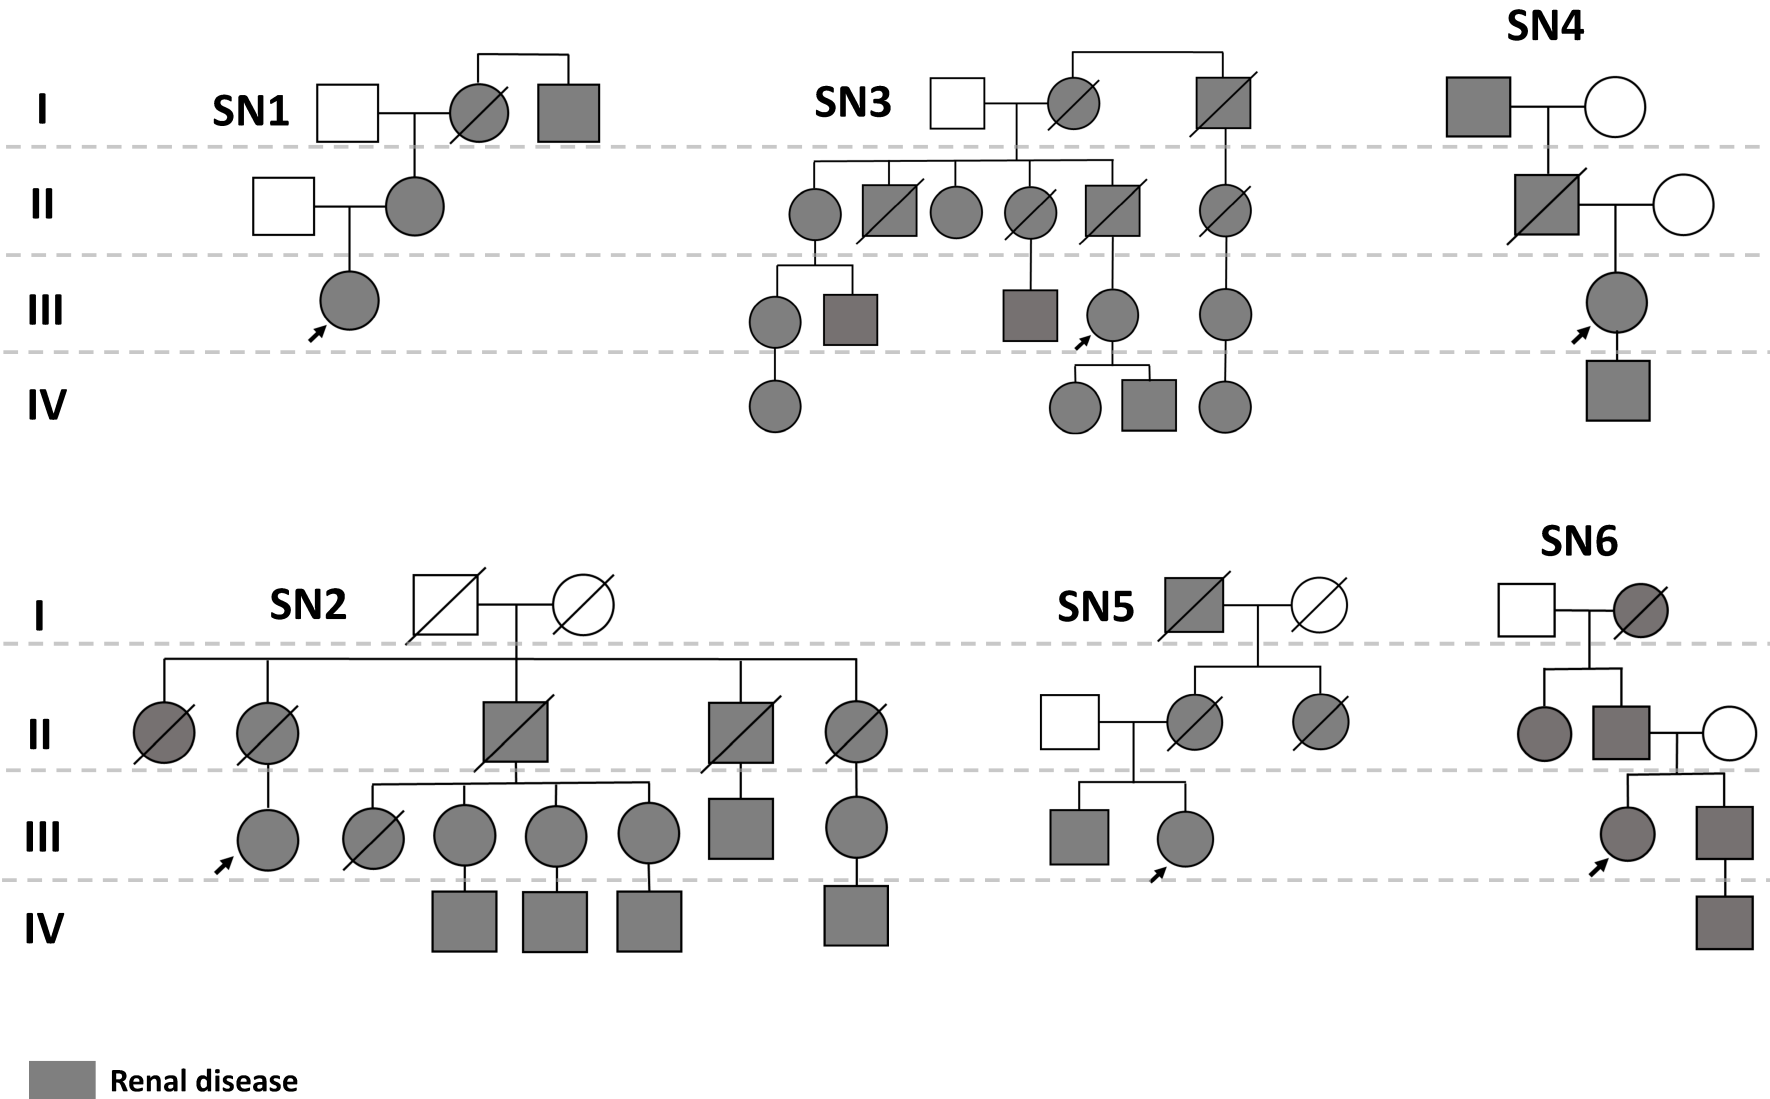

# Nottingham Cohort

Figure S6

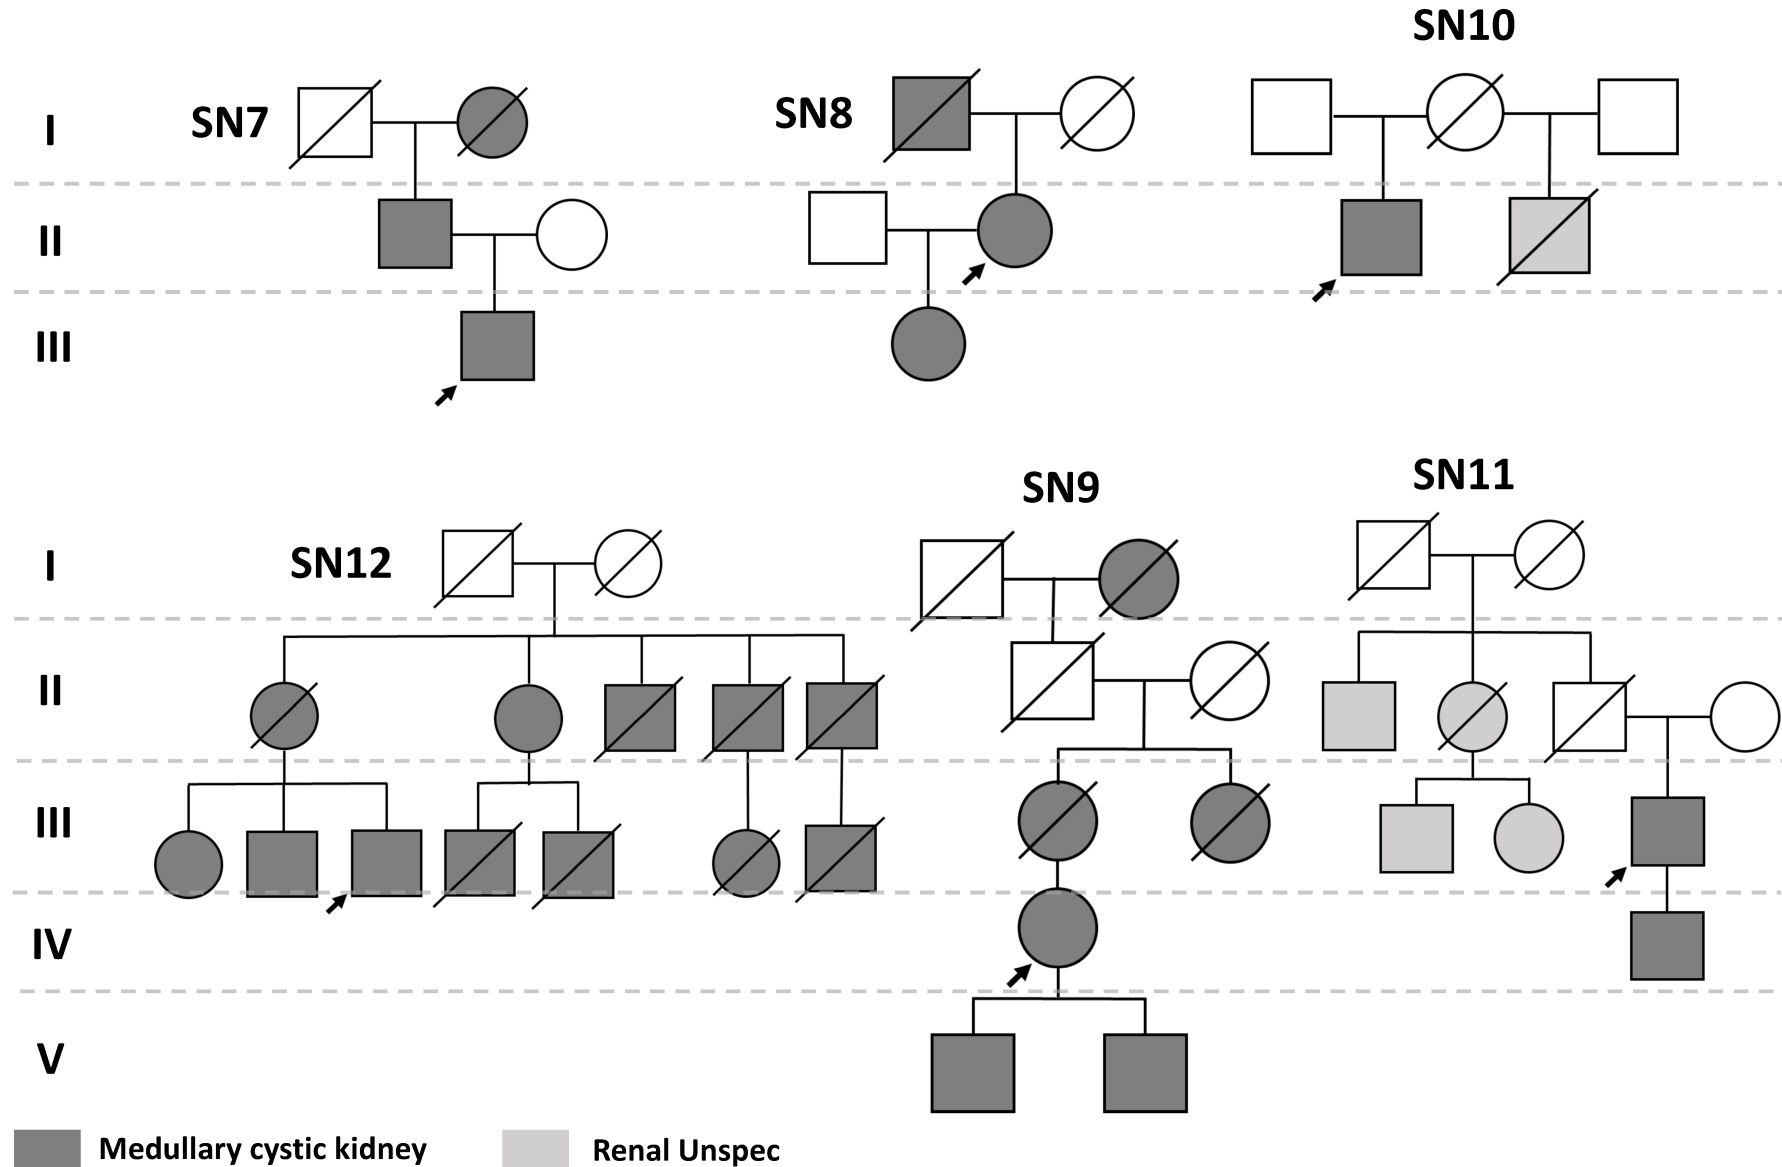

Figure S7

# 100k Genomes Project

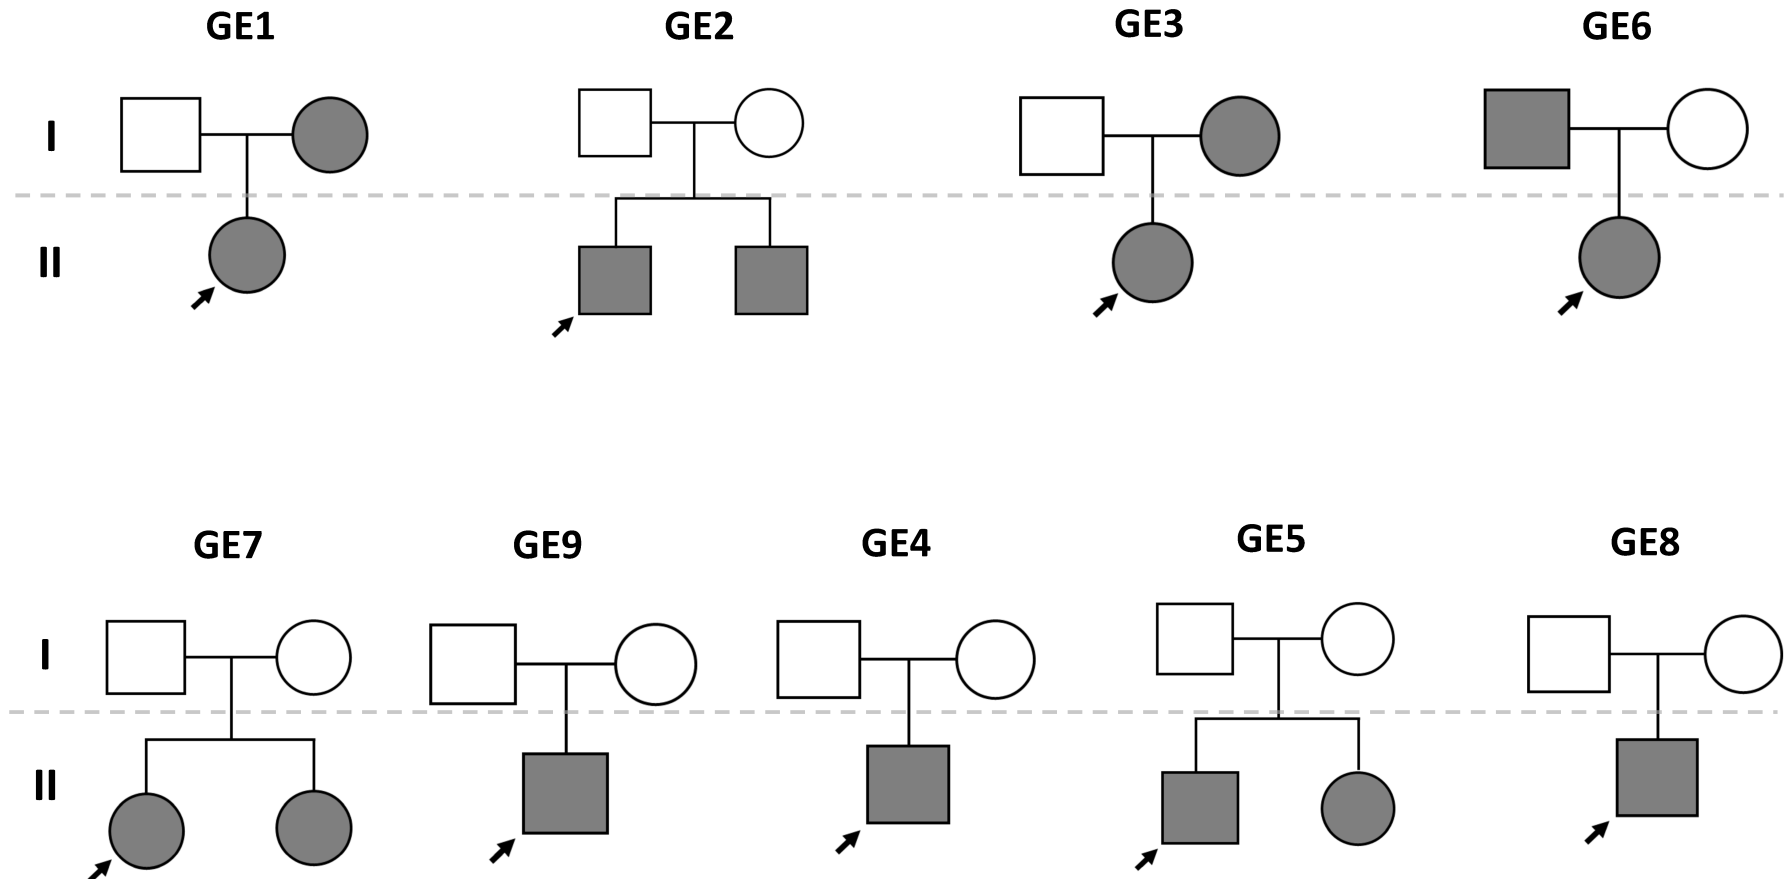

Supplement: inline-supplementary-material-1 [file inline-supplementary-material-1.pdf]
